# Supplementary material for: Genome evolution drives transcriptomic and phenotypic adaptation in Pseudomonas aeruginosa during 20 years of infection
Source: PubMed Central journal article supplement (PMC8743555; doi:10.1099/mgen.0.000681), 2021-11-26
Supplement: mgen-7-0681-s001.pdf [file mgen-7-0681-s001.pdf]

**S1 Table.** Summary of isolates taken for study, patient details and antibiotic treatment at time of sampling.

| Sample                                             | Date of Collection (MM/DD/YY) | Patient age | FEV1 % predicted <sup>a</sup> at sputum sampling | Antibiotic treatment at time of sampling    |
|----------------------------------------------------|-------------------------------|-------------|--------------------------------------------------|---------------------------------------------|
| <b>Early Isolates</b>                              |                               |             |                                                  |                                             |
| E-S2239-16<br>E-MSB2494<br>E-MSB3405<br>E-S2239-15 | 12/91                         | 26          | 53 <sup>b</sup>                                  | Cotrimoxizole,<br>Ciprofloxacin, Gentamycin |
| <b>Late Isolates</b>                               |                               |             |                                                  |                                             |
| L-001-1A<br>L-001-1B<br>L-001-1C                   | 15/08/12                      | 46          | 18                                               | Azithromycin                                |
| L-001-2A<br>L-001-2B                               | 17/10/12                      | 47          | 21                                               | Azithromycin, Tobramycin,<br>Cefepime       |
| L-001-3A<br>L-001-3B                               | 21/11/12                      | 47          | 21                                               | No Data                                     |
| L-001-4                                            | 21/01/13                      | 47          | 17                                               | Tobramycin, Meropenem                       |
| L-001-5A<br>L-001-5B                               | 18/04/13                      | 47          | 17                                               | No Data                                     |
| L-001-6                                            | 06/05/13                      | 47          | 17                                               | Tobramycin, Ceftazidime,<br>Azithromycin    |

<sup>a</sup> Sinclair SW, Avery SF, Brady DM, Smith DA, Holst PE, O'Donnell TV. Prediction formulae for normal pulmonary function values in New Zealand European subjects. *N Z Med J.* 1980;91(651):1-5.

*FEV1% predicted is defined as the Forced Expiratory Volume of the patient divided by the average FEV1% within the population for any person of similar age, sex, and body composition. This is used as a measure of reduced lung function, compared to what would be expected of a person with 'normal' lung function.*

<sup>b</sup> Precise FEV1 is not available at time of sampling, number presented is average FEV1 % for the 2nd half of 1991

**S2 Table.** Summary of antibiotics administered to the patient at time of, or between sampling of early and late isolates of *P. aeruginosa*.

**Known antibiotic treatments given (1991-2013) <sup>a, b</sup>**

Augmentin  
Azithromycin  
Cefepime  
Ceftazidime  
Ciprofloxacin  
Clarithromycin  
Colomycin/Colistin  
Cotrimoxazole  
Fucidin  
Gentamycin  
Meropenem  
Moxifloxacin  
Piperacillin  
Tobramycin

<sup>a</sup> This is not an exhaustive list of all antibiotics the patient received, but covers those administered at time of sampling or between samples.

<sup>b</sup> Antibiotics listed are ones the patient received, this is not a list of antibiotics administered solely to combat *P. aeruginosa* infection.

**S3 Table.** Summary assembly and gene prediction statistics for isolates whole-genome sequenced.

| isolate    | total_length | n_contigs | circular | N_count | gaps | ont_N50 | ont_qscore | ont_bases     | ont_cov | miseq_qscore | miseq_bases | miseq_cov | pred_CDS | Biosample    |
|------------|--------------|-----------|----------|---------|------|---------|------------|---------------|---------|--------------|-------------|-----------|----------|--------------|
| E-S2239-15 | 6,407,559    | 1         | yes      | 0       | 0    | 19,875  | 13.3       | 1,394,937,072 | 217.7   | 35.3         | 103,038,935 | 16.1      | 5802     | SAMN13234651 |
| E-S2239-16 | 6,315,896    | 1         | yes      | 0       | 0    | 23,364  | 13.3       | 1,146,375,768 | 181.5   | 35.3         | 114,392,328 | 18.1      | 5717     | SAMN13234648 |
| E-MSB2494  | 6,330,120    | 1         | yes      | 0       | 0    | 7,556   | 13.1       | 1,001,416,848 | 158.2   | 35.3         | 154,738,111 | 24.4      | 5737     | SAMN13234649 |
| E-MSB3405  | 6,315,897    | 1         | yes      | 0       | 0    | 22,478  | 13.3       | 1,196,529,488 | 189.4   | 35.3         | 96,322,838  | 15.3      | 5718     | SAMN13234650 |
| L-001-1A   | 6,269,726    | 1         | yes      | 0       | 0    | 20,311  | 13.3       | 824,514,262   | 131.5   | 35.3         | 71,982,494  | 11.5      | 5691     | SAMN13234657 |
| L-001-1B   | 6,270,234    | 1         | yes      | 0       | 0    | 26,365  | 13.3       | 658,327,564   | 105.0   | 35.3         | 118,980,668 | 19.0      | 5705     | SAMN13234652 |
| L-001-1C   | 6,268,635    | 1         | yes      | 0       | 0    | 17,303  | 13.3       | 1,290,121,361 | 205.8   | 35.2         | 96,909,163  | 15.5      | 5688     | SAMN13234659 |
| L-001-2A   | 6,268,813    | 1         | yes      | 0       | 0    | 19,144  | 13.3       | 1,139,680,807 | 181.8   | 35.3         | 84,017,737  | 13.4      | 5691     | SAMN13234660 |
| L-001-2B   | 6,270,419    | 1         | yes      | 0       | 0    | 19,382  | 13.2       | 1,173,114,665 | 187.1   | 35.3         | 97,922,867  | 15.6      | 5695     | SAMN13234658 |
| L-001-3A   | 6,267,105    | 1         | yes      | 0       | 0    | 19,255  | 13.3       | 1,084,955,690 | 173.1   | 35.2         | 97,672,750  | 15.6      | 5692     | SAMN13234661 |
| L-001-3B   | 6,269,926    | 1         | yes      | 0       | 0    | 17,568  | 13.3       | 719,291,575   | 114.7   | 35.3         | 117,042,558 | 18.7      | 5699     | SAMN13234655 |
| L-001-4    | 6,269,046    | 1         | yes      | 0       | 0    | 20,001  | 13.2       | 697,520,061   | 111.3   | 35.3         | 113,721,808 | 18.1      | 5692     | SAMN13234654 |
| L-001-5A   | 6,270,090    | 1         | yes      | 0       | 0    | 22,496  | 13.3       | 626,823,565   | 100.0   | 35.1         | 112,667,053 | 18.0      | 5696     | SAMN13234662 |
| L-001-5B   | 6,270,238    | 1         | yes      | 0       | 0    | 20,014  | 13.2       | 993,479,333   | 158.4   | 35.3         | 100,880,789 | 16.1      | 5709     | SAMN13234653 |
| L-001-6    | 6,255,746    | 1         | yes      | 0       | 0    | 17,642  | 13.3       | 815,860,744   | 130.4   | 35.3         | 113,412,261 | 18.1      | 5681     | SAMN13234656 |

**LEGEND**

|                     |                                                             |
|---------------------|-------------------------------------------------------------|
| <b>isolate</b>      | Strain IDs                                                  |
| <b>total_length</b> | Total length (bp) of contigs in the assembly                |
| <b>n_contigs</b>    | Number of contigs (if 1, then one chromosome w/ plasmid)    |
| <b>circular</b>     | Is contig 1 (chromosome) complete and circular (yes/no)     |
| <b>N_count</b>      | Number of uncalled nucleotides (N's) in final sequence      |
| <b>gaps</b>         | Amount of gaps (stretches of N's) in the assembly           |
| <b>ont_N50</b>      | Read length that delimits 50% of sequenced bases (Nanopore) |
| <b>ont_qscore</b>   | Mean Phred quality score of Nanopore (long) reads           |
| <b>ont_bases</b>    | Total amount of bases sequenced per nanopore library        |
| <b>ont_cov</b>      | Amount of nanopore bases divided by genome size             |
| <b>miseq_qscore</b> | Mean Phred quality score of Illumina MiSeq (short) reads    |
| <b>miseq_bases</b>  | Total amount of bases sequenced per MiSeq library           |
| <b>miseq_cov</b>    | Amount of MiSeq bases divided by genome size                |
| <b>pred_CDS</b>     | Number of predicted protein coding genes (from Prokka)      |

**S4 Table.** Summary mapping statistics for RNAseq of early isolate E-S2239-16 and late isolate L-001-1C

| <b>Sample</b> | <b>Number of paired reads</b> | <b>Sequence length range</b> | <b>Number of bootstraps</b> | <b>Mapping (%)</b> |
|---------------|-------------------------------|------------------------------|-----------------------------|--------------------|
| E-S2239-16    |                               |                              |                             |                    |
| 01            | 3446702                       | 20-125                       | 1000                        | 80.4               |
| 02            | 4903036                       | 20-125                       | 1000                        | 86.6               |
| 03            | 4142012                       | 20-125                       | 1000                        | 83.9               |
| L-001-1C      |                               |                              |                             |                    |
| 01            | 5021309                       | 20-125                       | 1000                        | 80.6               |
| 02            | 4928204                       | 20-125                       | 1000                        | 85.7               |
| 03            | 4994328                       | 20-125                       | 1000                        | 83.5               |

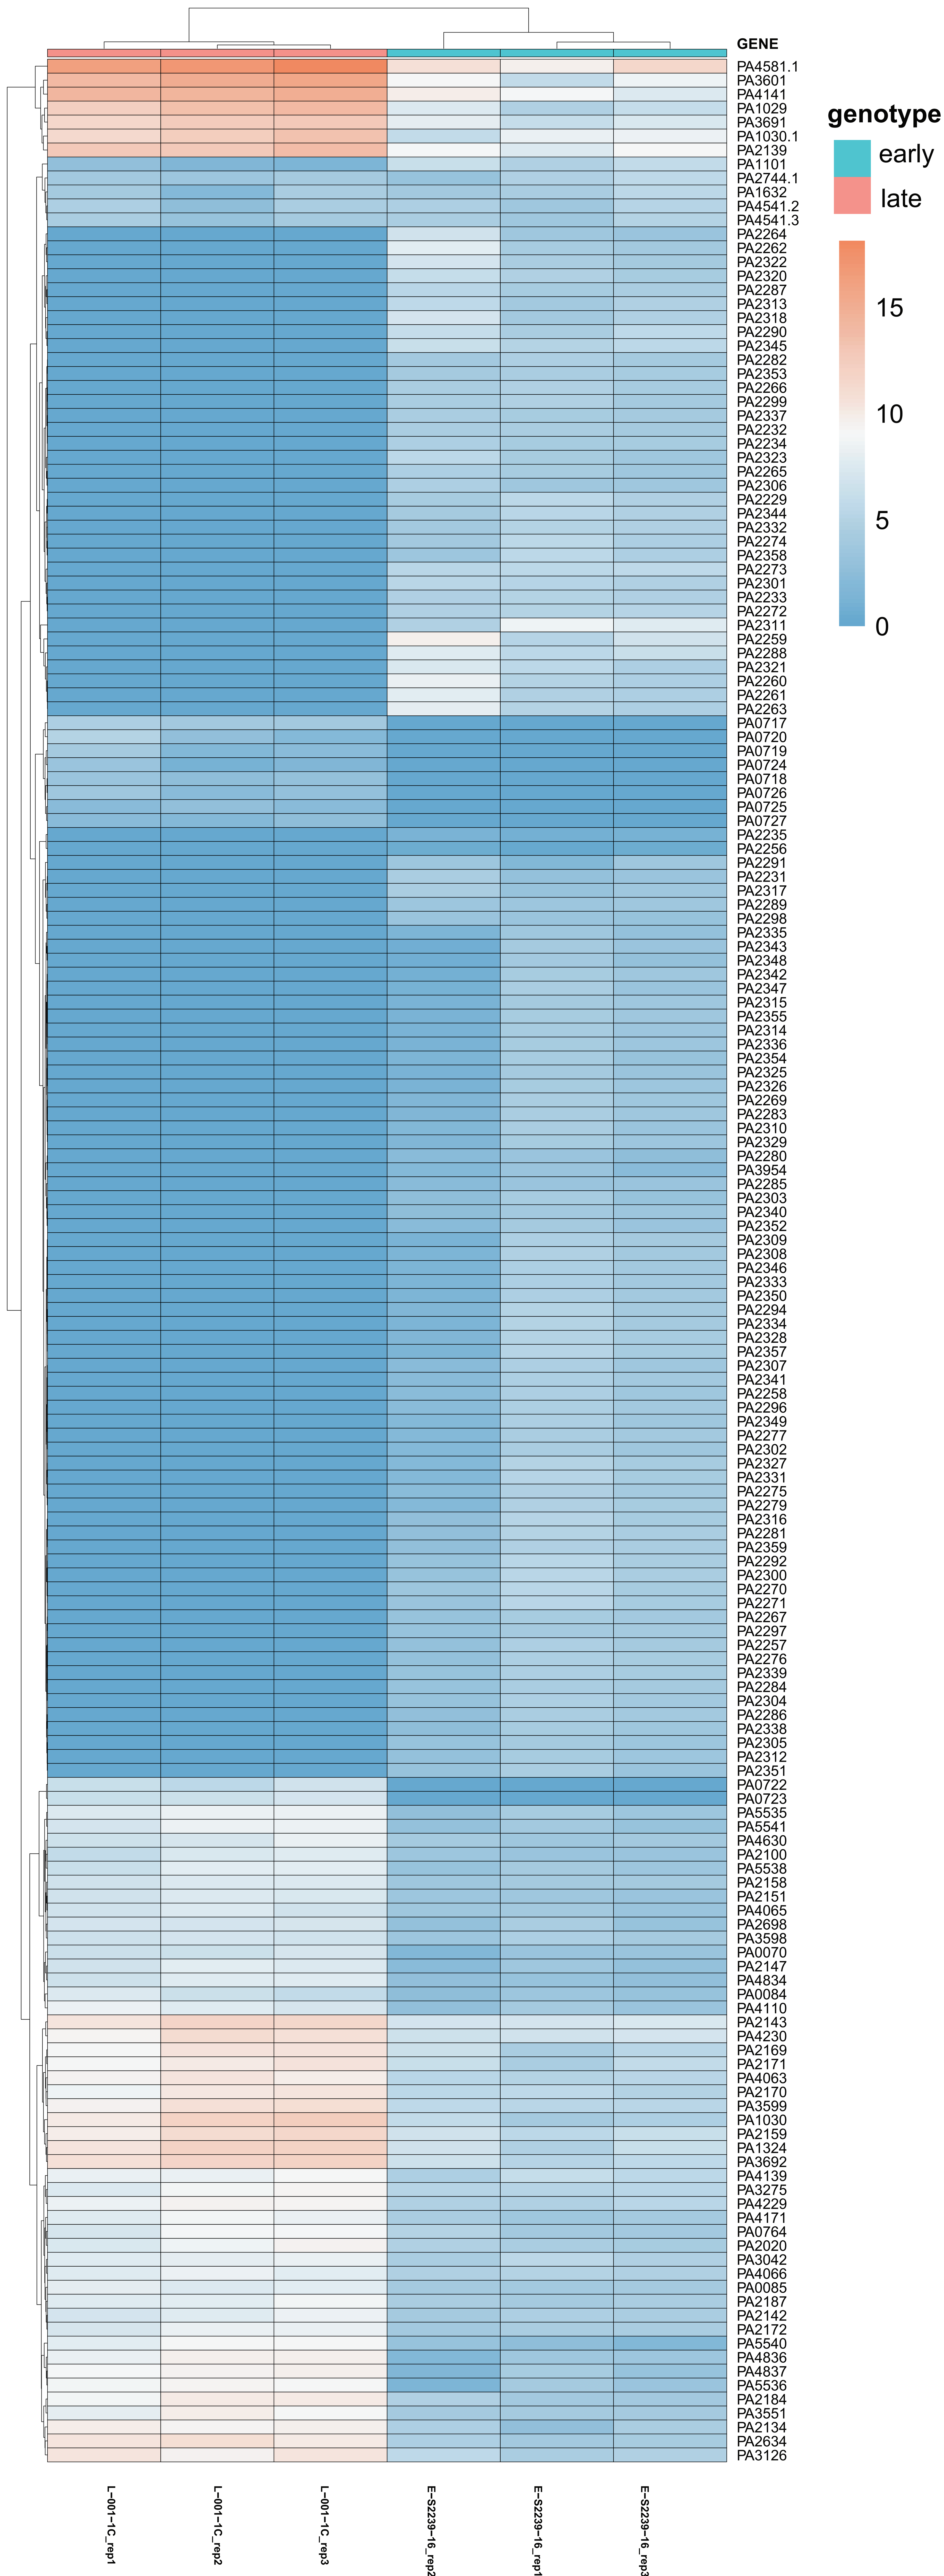

**S2 Fig. Heatmap showing significantly differentially expressed genes from RNAseq of L-001-1C and E-S2239-16.** Expression quantified as log of the counts per gene. Triplicates of L-001-1C RNAseq are shown in the left columns, triplicates of E-S2239-16 RNAseq are shown in the right columns.

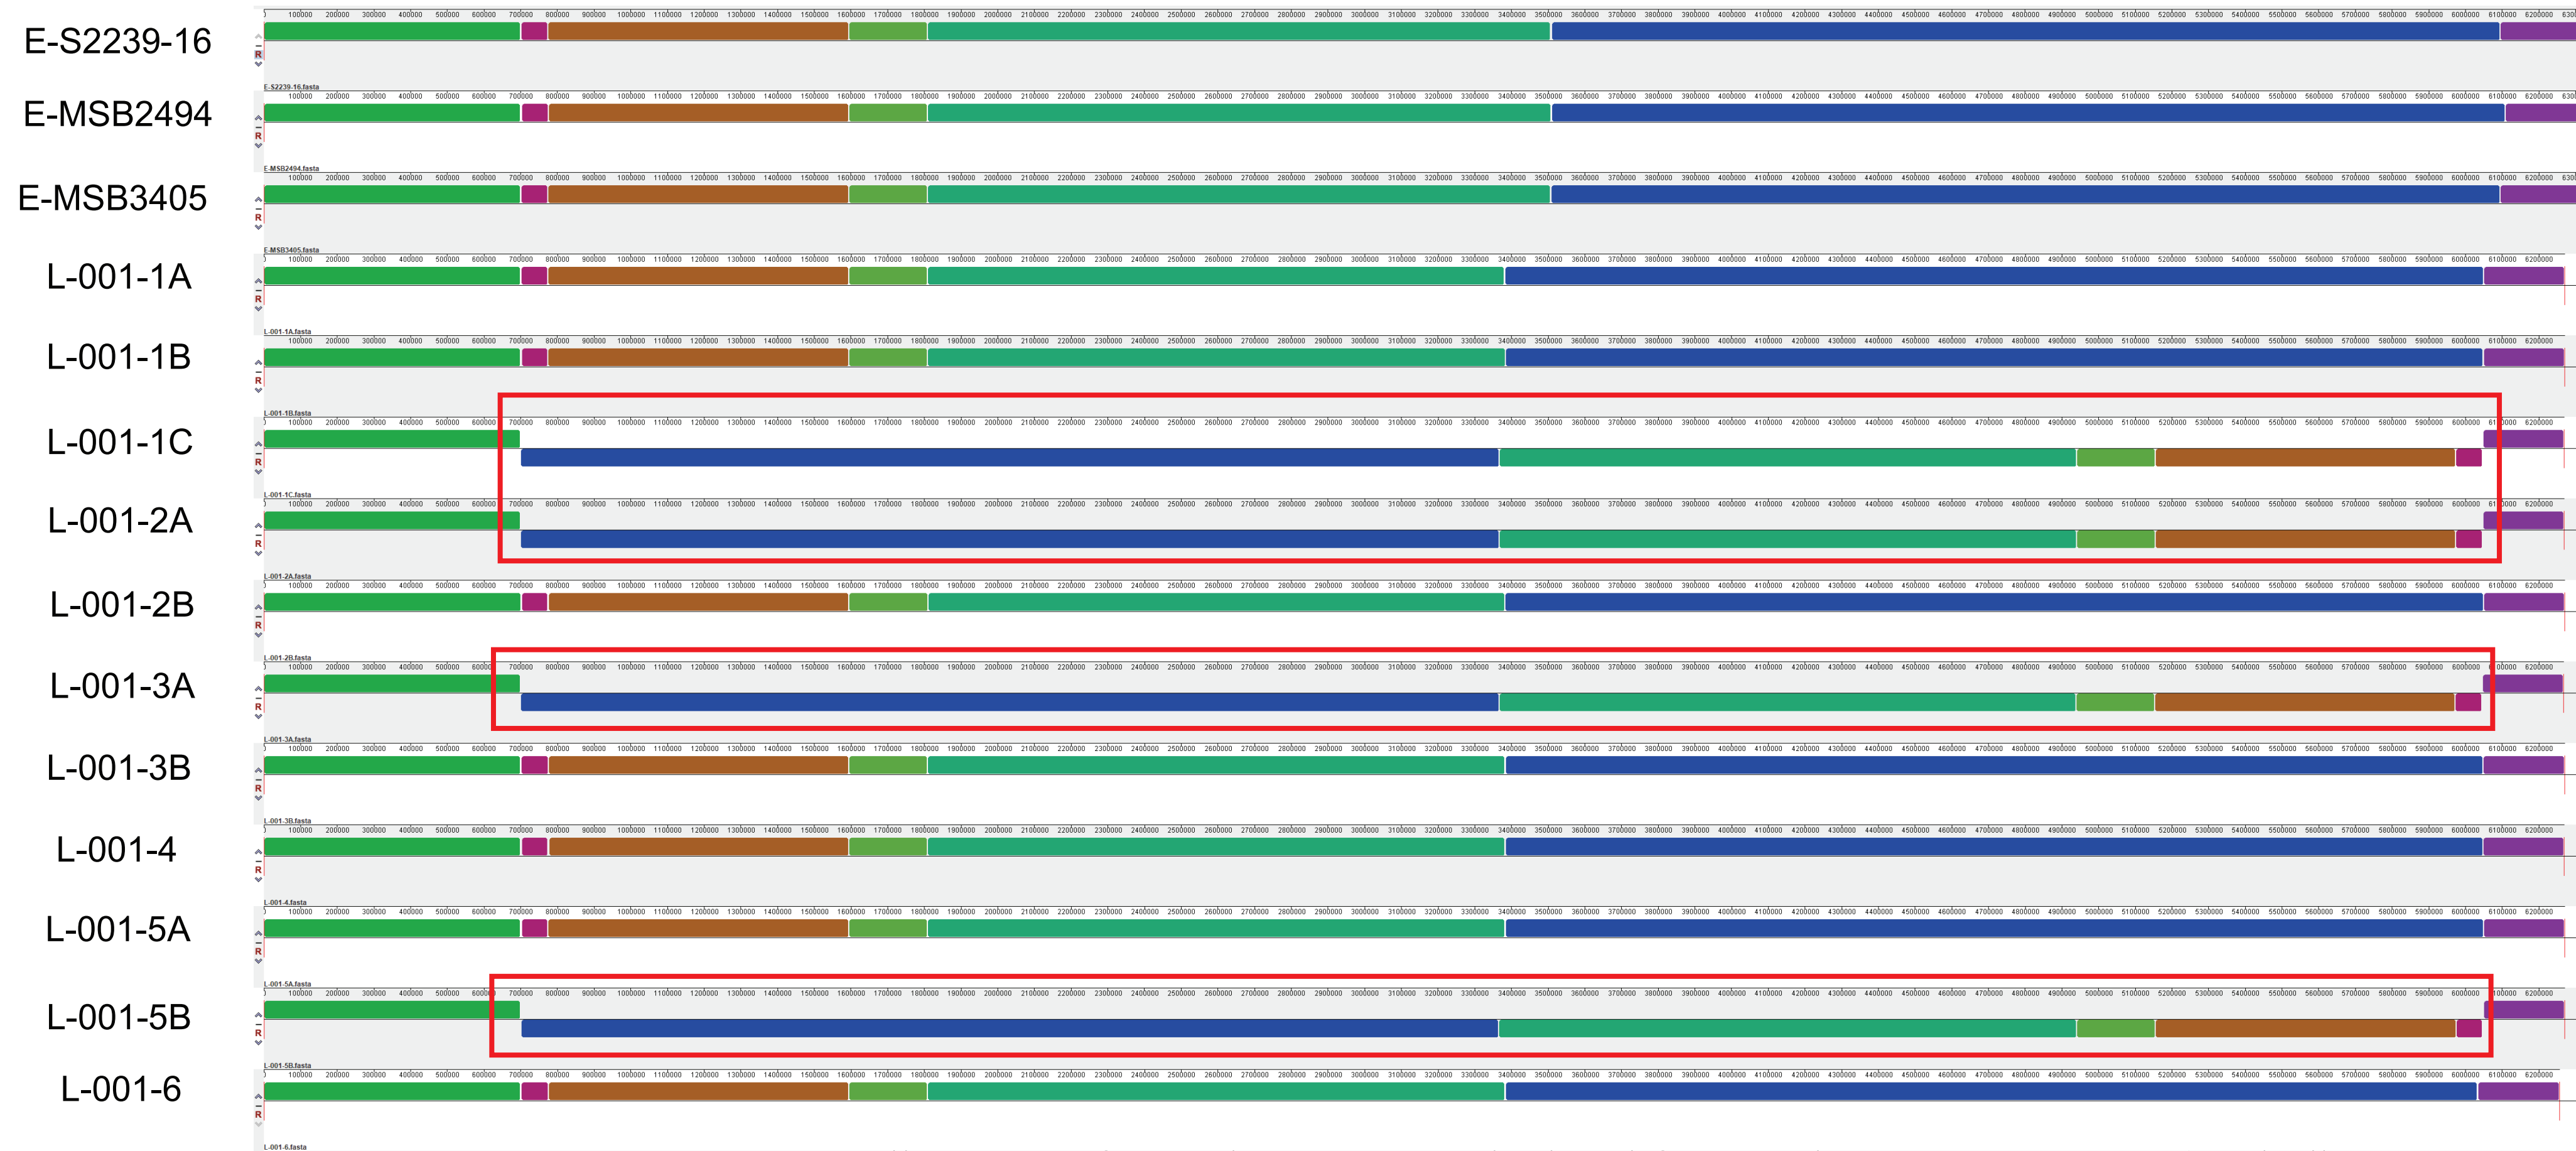

**S3 Fig. Rearrangements within isolates.** Mauve alignment of complete genomes isolated from patient 20 years apart (excluding S2239-15). Showing a clear inversion of 0.9Mb (highlighted) in 4 of the 11 late isolates, occurring between rRNA operons which are the inversion endpoints.

**S6 Table.** Pairwise matrix of non-synonymous changes between isolates of *P. aeruginosa* from patient with CF

|            | E-S2239-16 | MSB2494 | MSB3464 | L-001-1A | L-001-1B | L-001-1C | L-001-2A | L-001-2B | L-001-3A | L-001-3B | L-001-4 | L-001-5A | L-001-5B | L-001-6 |
|------------|------------|---------|---------|----------|----------|----------|----------|----------|----------|----------|---------|----------|----------|---------|
| E-S2239-16 | 0          | 12      | 4       | 179      | 246      | 211      | 209      | 197      | 214      | 245      | 206     | 216      | 266      | 239     |
| E-MSB2494  | -          | 0       | 12      | 185      | 252      | 219      | 215      | 205      | 220      | 251      | 212     | 222      | 272      | 245     |
| E-MSB3464  | -          | -       | 0       | 179      | 246      | 213      | 209      | 199      | 214      | 245      | 206     | 216      | 266      | 239     |
| L-001-1A   | -          | -       | -       | 0        | 167      | 46       | 44       | 30       | 49       | 94       | 51      | 49       | 185      | 86      |
| L-001-1B   | -          | -       | -       | -        | 0        | 195      | 191      | 183      | 198      | 229      | 190     | 198      | 40       | 221     |
| L-001-1C   | -          | -       | -       | -        | -        | 0        | 16       | 64       | 23       | 124      | 81      | 77       | 213      | 114     |
| L-001-2A   | -          | -       | -       | -        | -        | -        | 0        | 62       | 13       | 122      | 79      | 75       | 211      | 112     |
| L-001-2B   | -          | -       | -       | -        | -        | -        | -        | 0        | 69       | 112      | 71      | 65       | 203      | 106     |
| L-001-3A   | -          | -       | -       | -        | -        | -        | -        | -        | 0        | 127      | 86      | 82       | 218      | 119     |
| L-001-3B   | -          | -       | -       | -        | -        | -        | -        | -        | -        | 0        | 81      | 127      | 247      | 52      |
| L-001-4    | -          | -       | -       | -        | -        | -        | -        | -        | -        | -        | 0       | 84       | 208      | 71      |
| L-001-5A   | -          | -       | -       | -        | -        | -        | -        | -        | -        | -        | -       | 0        | 216      | 117     |
| L-001-5B   | -          | -       | -       | -        | -        | -        | -        | -        | -        | -        | -       | -        | 0        | 239     |
| L-001-6    | -          | -       | -       | -        | -        | -        | -        | -        | -        | -        | -       | -        | -        | 0       |

Number of non-synonymous changes

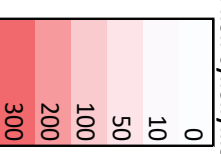



**S8 Table.** Prevalence of specific nucleotide changes across all single nucleotide in all *P. aeruginosa* isolates analysed in this study

| Single nucleotide mutation (n=935) |   | Mutant allele (freq) |     |    |    |
|------------------------------------|---|----------------------|-----|----|----|
|                                    |   | A                    | T   | G  | C  |
| Starting allele                    | A | 0                    | 2   | 22 | 1  |
|                                    | T | 4                    | 0   | 6  | 19 |
|                                    | G | 49                   | 298 | 0  | 4  |
|                                    | C | 326                  | 54  | 3  | 0  |

  

| Single nucleotide mutation (n=935) |   | Mutant allele (%) |      |     |     |
|------------------------------------|---|-------------------|------|-----|-----|
|                                    |   | A                 | T    | G   | C   |
| Starting allele                    | A | 0.0               | 0.3  | 2.8 | 0.1 |
|                                    | T | 0.5               | 0.0  | 0.8 | 2.4 |
|                                    | G | 6.2               | 37.8 | 0.0 | 0.5 |
|                                    | C | 41.4              | 6.9  | 0.4 | 0.0 |

  

| freq | (%) |
|------|-----|
| 0    | 0   |
| 10   | 1   |
| 50   | 5   |
| 100  | 10  |
| 200  | 20  |
| 400  | 40  |
